# Supplementary material
Source: PubMed Central journal article supplement (PMC4942365)
Supplement: NIHMS769874-supplement-supplement_1.pdf [file NIHMS769874-supplement-supplement_1.pdf]

## **STEPP Subpopulation Analysis for Continuous, Binary and Count Outcomes**

### **Supplementary Material Document**

This document contains all the supplementary material associated with the manuscript entitled “STEPP Subpopulation Analysis for Continuous, Binary, and Count Outcomes”. It contains the following sections:

1. Complete analyses for the Aspirin/Folate data
  - a. Placebo vs. 81 mg. of aspirin
  - b. Placebo vs. 325 mg. of aspirin
  - c. 81 mg. vs. 325 mg. of aspirin
  
2. Sensitivity analysis: impact of  $r_1$  and  $r_2$  on Aspirin Study results
3. R Code for the Aspirin/Folate data analyses
4. Analyses using alternative methodologies
  - a. Simple logistic regression with an interaction term
  - b. MFPI
  - c. Virtual Twin Method
5. Description of the New STEPP software
6. Simulation results of null
  - a. No treatment effects, no heterogeneity
  - b. Constant treatment effects but no heterogeneity

### 1. Complete analyses for the Aspirin/Folate data

The result of the original study was published in the New England Journal of Medicine [Baron et al 2003] and concluded that low-dose aspirin has a moderate chemopreventive effect on adenomas in the large bowel. We used STEPP to investigate whether the magnitude of the treatment effect is similar across subpopulations defined by patient age. The 3 STEPP analyses are presented below followed by a sensitivity analysis.

#### STEPP Analysis 1: Placebo vs 81 mg of aspirin

The GLM model for this stepp analysis is

$$\text{logit}(EY) = \beta_0 + \beta_1 * \text{Treatment}$$

The subpopulations are:

Number of patients per subpopulation (patspop r2): 100  
 Largest number of patients in common among consecutive subpopulations (minpatspop r1): 30  
 Number Of Subpopulations Created : 8

#### Subpopulation Summary Information

| Subpopulation | Covariate Summary |         |         | Sample Size |
|---------------|-------------------|---------|---------|-------------|
|               | Median            | Minimum | Maximum |             |
| 1             | 43.00             | 29.0000 | 47.0000 | 107         |
| 2             | 50.00             | 46.0000 | 51.0000 | 128         |
| 3             | 53.00             | 52.0000 | 55.0000 | 118         |
| 4             | 57.00             | 55.0000 | 59.0000 | 126         |
| 5             | 61.00             | 59.0000 | 62.0000 | 115         |
| 6             | 64.00             | 62.0000 | 66.0000 | 103         |
| 7             | 68.00             | 66.0000 | 71.0000 | 101         |
| 8             | 73.00             | 70.0000 | 78.0000 | 88          |

The following are the STEPP plots:

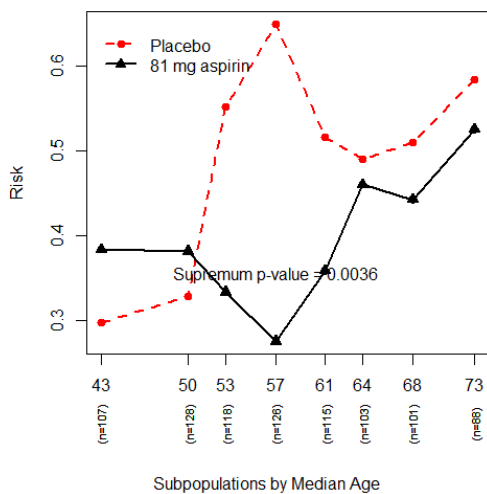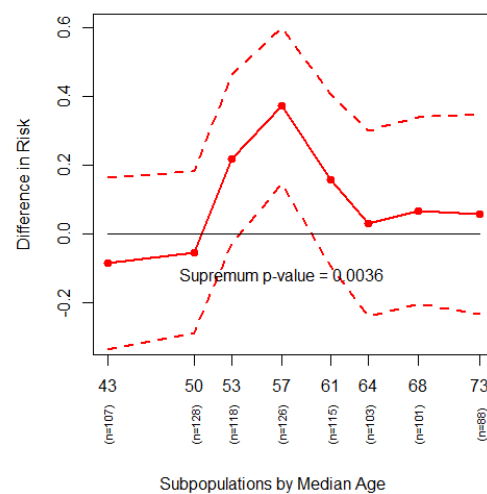

The first STEPP plot shows the risk (or probability of having adenomas) for both treatment groups along different age subgroups – the “red” dashed line is the placebo group and the “black” solid line is the 81mg aspirin group. The 2<sup>nd</sup> STEPP plot shows the actual differences in risk of getting adenomas in various age subgroups between the placebo and the 81 mg aspirin treatment groups. The interaction p-value based on risk difference is 0.0036 indicating a possible interaction effect between risk and age. It indicates that the effect of the 81 mg to reduce the risk of having adenomas compared with placebo appears to be larger for patients in the middle age subpopulations than it is for either the youngest or oldest subpopulations.

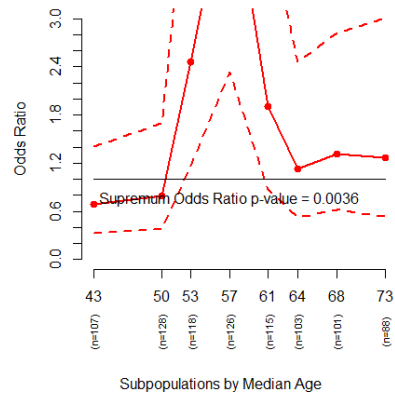

The 3<sup>rd</sup> STEPP plot shows the odds ratio of getting adenomas in various age subgroups between the placebo and the 81 mg aspirin treatment groups. The overall odds ratio of having adenomas is ~1.46 comparing the placebo vs 81 mg of aspirin treatment groups. The interaction P-value based on odds ratio estimates is also 0.0036 also indicating a possible interaction effect between odds ratio and age.

Looking at these plots, there seems to be a cross over between age 50-64. It is important to note that STEPP simply suggests a hypothesis that there is a reduction of risks of getting adenomas for the 81 mg aspirin group compare with the placebo group for patients between 50 and 64. Further study may be needed to definitively identify the exact cut points.

### STEPP Analysis 2: Placebo vs 325 mg of aspirin

The GLM model for this stepp analysis is

$$\text{logit}(EY) = \beta_0 + \beta_1 * \text{Treatment}$$

with subpopulations of different age groups among treatments of DOSE0 and DOSE2.

The subpopulations are:

Number of patients per subpopulation (patspop r2): 100  
 Largest number of patients in common among consecutive subpopulations(minpatspop r1): 30  
 Number Of Subpopulations Created : 8

#### Subpopulation Summary Information

| Subpopulation | Covariate Summary |         |         | Sample Size |
|---------------|-------------------|---------|---------|-------------|
|               | Median            | Minimum | Maximum |             |
| 1             | 44.00             | 29.0000 | 48.0000 | 106         |
| 2             | 50.00             | 47.0000 | 51.0000 | 126         |
| 3             | 53.00             | 52.0000 | 55.0000 | 116         |
| 4             | 57.00             | 55.0000 | 59.0000 | 122         |
| 5             | 61.00             | 60.0000 | 63.0000 | 109         |
| 6             | 64.00             | 63.0000 | 67.0000 | 105         |
| 7             | 70.00             | 67.0000 | 74.0000 | 105         |
| 8             | 74.00             | 72.0000 | 79.0000 | 56          |

The following are the STEPP plots:

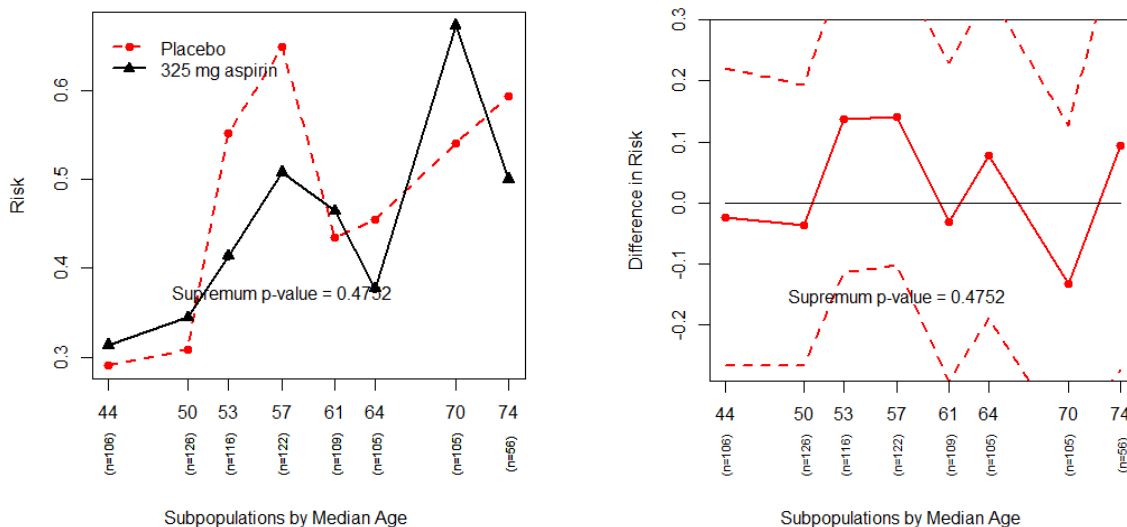

The first STEPP plot shows the risk (probability of having adenomas) for both treatment groups along different age subgroups – the “red” dashed line is the placebo group and the “black” solid line is the 325mg aspirin group. The 2<sup>nd</sup> STEPP plot shows the actual differences in risk of getting adenomas in various age subgroups between the placebo and the 325 mg aspirin

treatment groups. The interaction p-value based on risk differences is 0.48 indicating that there may not be any interaction between risk and age.

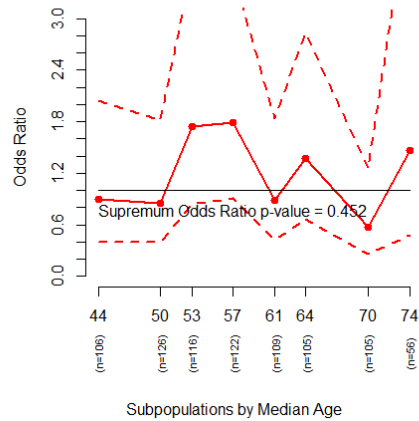

The 3<sup>rd</sup> STEPP plot shows the risk ratio of getting adenomas in various age subgroups between the placebo and the 325 mg aspirin treatment groups. The overall odds ratio of having adenomas is ~1.1 comparing the placebo vs 325 mg of aspirin treatment groups. The interaction P-value based on effect ratio is 0.452 also suggesting that there may not be any interaction between risk and age.

There may still be a cross over at age ~50. But the effect is not as drastic in both absolute and relative scale. Furthermore, the p-value is not significant. So, the effect detected could be due to chance.

### STEPP Analysis 3: 81 mg of aspirin vs 325 mg of aspirin

The GLM model for this stepp analysis is

$$\text{logit}(EY) = \beta_0 + \beta_1 * \text{Treatment}$$

with subpopulations of different age groups among treatments of DOSE1 and DOSE2.

The subpopulations are:

Number of patients per subpopulation (patspop r2): 100  
 Largest number of patients in common among consecutive subpopulations (minpatspop r1): 30  
 Number Of Subpopulations Created : 8

#### Subpopulation Summary Information

| Subpopulation | Covariate Summary |         |         | Sample Size |
|---------------|-------------------|---------|---------|-------------|
|               | Median            | Minimum | Maximum |             |
| 1             | 44.00             | 29.0000 | 47.0000 | 104         |
| 2             | 50.00             | 47.0000 | 51.0000 | 106         |
| 3             | 54.00             | 52.0000 | 55.0000 | 118         |
| 4             | 56.50             | 55.0000 | 58.0000 | 106         |
| 5             | 60.00             | 58.0000 | 61.0000 | 116         |
| 6             | 64.00             | 62.0000 | 66.0000 | 107         |
| 7             | 68.00             | 66.0000 | 71.0000 | 102         |
| 8             | 73.00             | 71.0000 | 79.0000 | 67          |

The following are the 3 STEPP plots:

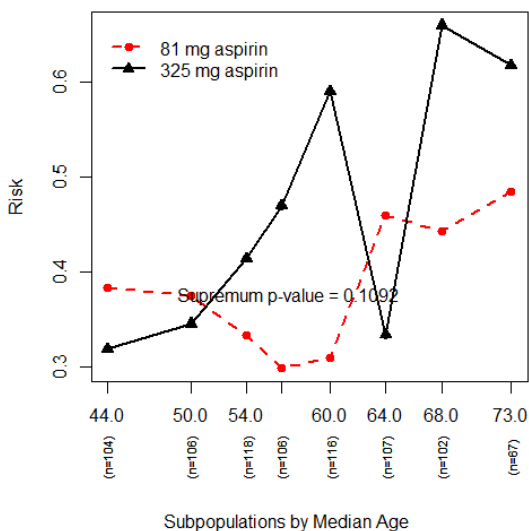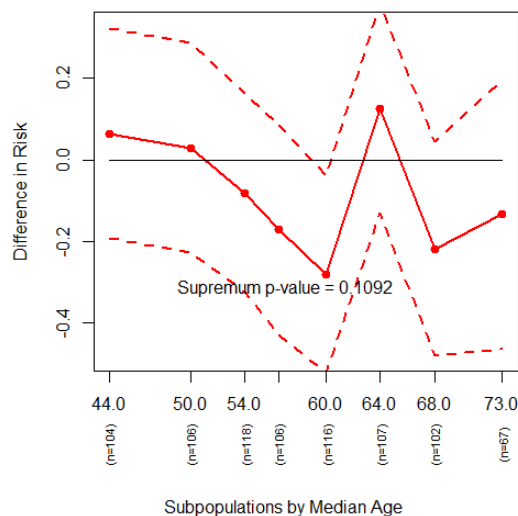

The first STEPP plot shows the risk (probability of having adenomas) for both treatment groups along different age subgroups – the “red” dashed line is the 81 mg aspirin group and the “black” solid line is the 325mg aspirin group. The 2<sup>nd</sup> STEPP plot shows the actual differences in risk of

getting adenomas in various age subgroups between the 81 mg aspirin and the 325 mg aspirin treatment groups. The interaction P-value based on risk difference is 0.109 indicating a borderline-significant result.

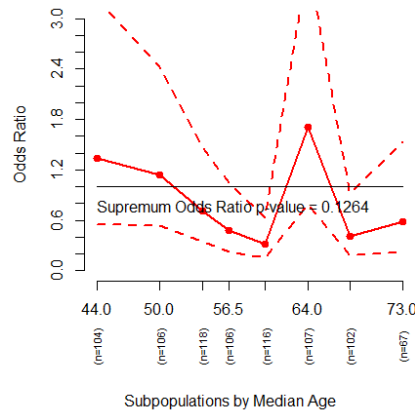

The 3<sup>rd</sup> STEPP plot shows the odds ratio of getting adenomas in various age subgroups between the 81 mg aspirin and the 325 mg aspirin treatment groups. The overall odds ratio of having adenomas is ~0.75 comparing 81 mg vs 325 mg of aspirin treatment groups. The interaction P-value based on odds ratio is 0.126 indicating a borderline significant interaction effect between treatments and age.

There may be a cross overs at age ~50. The interaction between risk difference and age may be borderline significant in both absolute and relative scale. Looking at the plots, it does seem to have a small beneficial effect for patients taking 81 mg daily vs 325 mg daily between 50 and 60s. Again, STEPP just suggests a hypothesis. Further studies are needed to identify the exact cutoffs.

## Conclusion

The results of the aspirin data set confirms with the studies' original result which shows a moderate beneficial effect on getting adenoma with a daily dosage of 81 mg of aspirin. But, in addition, it shows graphically that the risk decreases substantially for patients in age group between 50 and 60. The permutation p value indicates that the interaction is significant. However, the benefit disappears when the daily dosage of 325 mg of aspirin is used. The permutation p value indicates that there does not appear to have any interaction at this dosage. Lastly, it suggests slight risk improvements when comparing the 81 mg daily and 325 mg daily aspirin dosage. The permutation p value indicates only borderline significance of the interaction.

Thus, STEPP confirms the original findings and identifies the age subgroup which may be most benefitted by taking low-dosage aspirin.



## 2. Sensitivity Analysis: Impact of $r_1$ and $r_2$ on Aspirin Study results

A sensitivity analysis was done to explore the pattern of change in results when the STEPP smoothing parameters ( $r_1$  and  $r_2$ ) change. The smoothing parameter  $r_2$ , the minimum number of patients in the subpopulation, takes on 100, 300 or 500 patients out of a total of 725; we compute  $r_1$ , the largest number of patients in common between two consecutive subpopulations, by considering the ratio of  $r_1/r_2$  to be 10%, 30%, 50%, 70% and 90%. The number of subpopulations created also changes as values of  $r_1$  and  $r_2$  vary.

There are three tables - one for each comparison scenario. All three STEPP statistics,  $T_1$  (the supremum statistic),  $T_2$  (the chisq statistics in the absolute scale), and  $T_1^*$  (the supremum statistic in the relative scale) are enumerated.

*Table A: Comparing 81 mg of aspirin with placebo. When the ratio  $r_1/r_2 \geq 50\%$ , most of the test statistics become significant. Also, tests are more significant when there are more subpopulations. The highlighted row was used for the aspirin study analysis in the manuscript.*

| $r_2$ | $r_1$ | $r_1/r_2$ | # of subpop | $T_1$  | $T_2$ | $T_1^*$ |
|-------|-------|-----------|-------------|--------|-------|---------|
| 100   | 10    | 10%       | 7           | 0.052  | 0.093 | 0.083   |
|       | 30    | 30%       | 8           | 0.004  | 0.047 | 0.011   |
|       | 50    | 50%       | 10          | 0.006  | 0.022 | 0.020   |
|       | 70    | 70%       | 13          | 0.004  | 0.008 | 0.006   |
|       | 90    | 90%       | 21          | 0.004  | 0.008 | 0.006   |
|       |       |           |             |        |       |         |
| 300   | 30    | 10%       | 3           | 0.159  | 0.280 | 0.236   |
|       | 90    | 30%       | 3           | 0.041  | 0.268 | 0.002   |
|       | 150   | 50%       | 4           | <0.001 | 0.002 | <0.001  |
|       | 210   | 70%       | 5           | 0.038  | 0.014 | 0.020   |
|       | 270   | 90%       | 9           | 0.038  | 0.014 | 0.020   |
|       |       |           |             |        |       |         |
| 500   | 50    | 10%       | 2           | 0.383  | 0.588 | 0.302   |
|       | 150   | 30%       | 2           | 0.561  | 0.285 | 0.361   |
|       | 250   | 50%       | 2           | 0.037  | 0.006 | 0.139   |
|       | 350   | 70%       | 3           | 0.009  | 0.010 | 0.025   |
|       | 450   | 90%       | 4           | 0.009  | 0.010 | 0.025   |
|       |       |           |             |        |       |         |

*Table B: Comparing 81 mg of aspirin with 325 mg of aspirin. None of the test statistics is significant for any combination of  $r_1$  and  $r_2$ .*

| $r_2$ | $r_1$ | $r_1/r_2$ | # of | $T_1$ | $T_2$ | $T_1^*$ |
|-------|-------|-----------|------|-------|-------|---------|
|-------|-------|-----------|------|-------|-------|---------|

|     |     |     | <i>subpop</i> |       |       |       |
|-----|-----|-----|---------------|-------|-------|-------|
| 100 | 10  | 10% | 7             | 0.646 | 0.384 | 0.633 |
|     | 30  | 30% | 8             | 0.475 | 0.390 | 0.772 |
|     | 50  | 50% | 10            | 0.631 | 0.196 | 0.468 |
|     | 70  | 70% | 13            | 0.238 | 0.692 | 0.505 |
|     | 90  | 90% | 21            | 0.275 | 0.583 | 0.585 |
|     |     |     |               |       |       |       |
| 300 | 30  | 10% | 3             | 0.295 | 0.422 | 0.454 |
|     | 90  | 30% | 3             | 0.204 | 0.112 | 0.268 |
|     | 150 | 50% | 4             | 0.512 | 0.542 | 0.608 |
|     | 210 | 70% | 5             | 0.260 | 0.077 | 0.364 |
|     | 270 | 90% | 9             | 0.342 | 0.602 | 0.433 |
|     |     |     |               |       |       |       |
| 500 | 50  | 10% | 2             | 0.812 | 0.676 | 0.766 |
|     | 150 | 30% | 2             | 0.578 | 0.714 | 0.623 |
|     | 250 | 50% | 2             | 0.892 | 0.800 | 0.823 |
|     | 350 | 70% | 3             | 0.652 | 0.514 | 0.801 |
|     | 450 | 90% | 4             | 0.518 | 0.381 | 0.472 |
|     |     |     |               |       |       |       |

Table C: Comparing 325 mg of aspirin with placebo. A small number of tests are borderline significant especially when  $r_1/r_2$  is above 70%.

| $r_2$ | $r_1$ | $r_1/r_2$ | # of<br><i>subpop</i> | $T_1$ | $T_2$ | $T_1^*$ |
|-------|-------|-----------|-----------------------|-------|-------|---------|
| 100   | 10    | 10%       | 7                     | 0.334 | 0.572 | 0.278   |
|       | 30    | 30%       | 8                     | 0.110 | 0.040 | 0.185   |
|       | 50    | 50%       | 10                    | 0.223 | 0.114 | 0.248   |
|       | 70    | 70%       | 13                    | 0.047 | 0.142 | 0.047   |
|       | 90    | 90%       | 21                    | 0.083 | 0.056 | 0.075   |
|       |       |           |                       |       |       |         |
| 200   | 30    | 10%       | 3                     | 0.220 | 0.410 | 0.238   |
|       | 90    | 30%       | 3                     | 0.231 | 0.005 | 0.108   |
|       | 150   | 50%       | 4                     | 0.082 | 0.108 | 0.058   |
|       | 210   | 70%       | 5                     | 0.316 | 0.164 | 0.313   |
|       | 270   | 90%       | 9                     | 0.017 | 0.022 | 0.008   |
|       |       |           |                       |       |       |         |
| 300   | 50    | 10%       | 2                     | 0.410 | 0.157 | 0.386   |
|       | 150   | 30%       | 2                     | 0.776 | 0.696 | 0.874   |
|       | 250   | 50%       | 2                     | 0.202 | 0.186 | 0.361   |
|       | 350   | 70%       | 3                     | 0.038 | 0.056 | 0.065   |
|       | 450   | 90%       | 4                     | 0.051 | 0.110 | 0.098   |
|       |       |           |                       |       |       |         |

Comparing 81 mg of aspirin with placebo, the sensitivity analysis result is consistent with our finding that there is evidence in the data to suggest interaction between treatment effect and age. The statistics are nominally significant in most combinations of  $r_1$  and  $r_2$ . By contrast, there is no evidence to suggest interaction between treatments of 81 mg of aspirin and 325 mg of aspirin and age. Comparing 325 mg of aspirin with placebo, there are only a few cases that are nominally significant suggesting that evidence supporting an interaction with age is weak.

Note that the result here is specific to this particular clinical trial. Our experience suggests that one cannot make generalizations as the pattern of heterogeneity could be very different in other situations. Similar to smoothing functions, one needs to choose some smoothing parameters for STEPP which may impact the results. For the aspirin trial example, we chose the number of patients per subpopulation ( $r_2$ ) to be 100 and the largest number of patients in common between consecutive subpopulations ( $r_1$ ) to be 30. This choice generates 8 subpopulations providing a good view of the treatment effects along age for analysis. Based on our experience and supported by this sensitivity analysis, the following are general guidelines for choosing  $r_1$  and  $r_2$ :

1. Choose  $r_2$  large enough to obtain a good estimate of the treatment effect within subpopulations.
2. Create at least 4-5 subpopulations.
3. Choose  $r_1/r_2$  to be about 30-50% as your initial investigation.
4. Make  $r_1, r_2$  larger to obtain a smoother STEPP plot, but not so large that you have less than 4 subpopulations.
5. To assess the consistency of the result, a simple sensitivity analysis is recommended by varying  $r_2$ .

### **3. R Code for the Aspirin/Folate data analyses**

```

#
# Aspirin Data Analysis
# 9/2/2014
#
library(steppe)
set.seed(1767287)
data(aspirin)
aspirinc <- aspirin[complete.cases(aspirin),]
attach(aspirinc)

# set up the sliding window pattern
inc_win <- steppe.win(type="sliding", r1=30, r2=100)

# subset the data for appropriate analysis
subset1 <- DOSE == 0 | DOSE == 81
subset2 <- DOSE == 0 | DOSE == 325
subset3 <- DOSE == 81 | DOSE == 325

aspirin1 <- aspirinc[subset1,]
aspirin2 <- aspirinc[subset2,]
aspirin3 <- aspirinc[subset3,]

detach(aspirinc)

trtA <- rep(0, dim(aspirin1)[1])
trtA[aspirin1[,"DOSE"] == 81] <- 1
trtB <- rep(0, dim(aspirin2)[1])
trtB[aspirin2[,"DOSE"] == 325] <- 1
trtC <- rep(0, dim(aspirin3)[1])
trtC[aspirin3[,"DOSE"] == 325] <- 1

#####
# Models for the 3 analysis
#####
#
# STEPP analysis A: placebo vs 81 mg aspirin
attach(aspirin1)
inc_sp <- steppe.subpop(swin=inc_win, cov=AGE)
summary(inc_win)
summary(inc_sp)

modelA <- steppe.GLM(coltrt=trtA, trts=c(0,1), colY=AD, glm="binomial")
steppeGLMA <- steppe.test(inc_sp, modelA, nperm=2500)
summary(steppeGLMA)
print(steppeGLMA)
plot(steppeGLMA, ncex=0.70, legendy=0,
      pline=-4.5, at = 57, color=c("red", "black"),
      xlabel="Subpopulations by Median Age", ylabel="Risk",
      tlegend=c("Placebo", "81 mg aspirin"), nlas=3, pointwise=FALSE,
      noyscale=TRUE, rug=FALSE)

detach(aspirin1)

```

```

#
# STEPP analysis B: placebo vs 325 mg aspirin
attach(aspirin2)
inc_sp <- stepp.subpop(swin=inc_win, cov=AGE)
summary(inc_win)
summary(inc_sp)

modelB <- stepp.GLM(coltrt=trtB, trts=c(0,1), colY=AD, glm="binomial")
steppGLMB <- stepp.test(inc_sp, modelB, nperm=2500)
summary(steppGLMB)
print(steppGLMB)
plot(steppGLMB, ncex=0.70,legendy=0,
      pline=-4.5, at = 57, color=c("red", "black"),
      xlabel="Subpopulations by Median Age", ylabel="Risk",
      tlegend=c("Placebo", "325 mg aspirin"), nlas=3, pointwise=FALSE,
      noyscale=TRUE, rug=FALSE)

detach(aspirin2)

#
# STEPP analysis C: 81 mg vs 325 mg of aspirin
attach(aspirin3)
inc_sp <- stepp.subpop(swin=inc_win, cov=AGE)
summary(inc_win)
summary(inc_sp)

modelC <- stepp.GLM(coltrt=trtC, trts=c(0,1), colY=AD, glm="binomial")
steppGLMC <- stepp.test(inc_sp, modelC, nperm=2500)
summary(steppGLMC)
print(steppGLMC)
plot(steppGLMC, ncex=0.70,legendy=0,
      pline=-4.5, at = 57, color=c("red", "black"),
      xlabel="Subpopulations by Median Age", ylabel="Risk",
      tlegend=c("81 mg aspirin", "325 mg aspirin"), nlas=3, pointwise=FALSE,
      noyscale=TRUE, rug=FALSE)

detach(aspirin3)

```

#### 4. Analyses using alternative methodologies

##### Summary

As a comparison to GLM stepp, we try the following alternative methods to detect interaction between dosage and age in the Aspirin/Folate Polyp Prevention Study data set.

The first method is to model the output with a logistic model with an interaction term (between dosage and age). Then, we can test if the coefficient of the interaction term is significant or not. We treat age first as a continuous covariate and then as a categorical covariate (divided into 3 categories, see below). The coefficients of the interaction term for both of these models are not significant.

We also model the same output using fractional polynomial and use MFPI to assess the interaction. It reports a significant result (with  $p$ -value = 0.0186) when fp2 is used and patients are grouped into 3 categories with roughly equal number of patients.

Finally, we compare STEPP with a non-parametric method: the Virtual Twin method. Our goals are quite different and so the comparison is not straightforward.

##### Data

Y denotes the outcome and is equal to 1 if there are adenomas and 0 if none; dose is the dosage (0, 81 and 325 mg of daily aspirin) and is used as treatment (idose is the categorical variable for dose); and age is the age of the patient and is continuous (cage is the categorical variable for age when it is divided into 3 categories: <53, 53-61, >61).

```
. tab cage
```

| cage  | Freq. | Percent | Cum.   |
|-------|-------|---------|--------|
| 0     | 344   | 31.73   | 31.73  |
| 1     | 375   | 34.59   | 66.33  |
| 2     | 365   | 33.67   | 100.00 |
| Total | 1,084 | 100.00  |        |

```
. tab idose
```

| idose | Freq. | Percent | Cum.   |
|-------|-------|---------|--------|
| 0     | 363   | 33.49   | 33.49  |
| 1     | 366   | 33.76   | 67.25  |
| 2     | 355   | 32.75   | 100.00 |
| Total | 1,084 | 100.00  |        |

##### Detail Results from STATA

## 1. simple logistic regression with an interaction term

### a. with an age \* idose interaction term

```
. logit y idose age ia

Iteration 0:  log likelihood = -742.04402
Iteration 1:  log likelihood = -730.19729
Iteration 2:  log likelihood = -730.18585
Iteration 3:  log likelihood = -730.18585

Logistic regression              Number of obs   =       1084
                                LR chi2(3)       =        23.72
                                Prob > chi2        =        0.0000
                                Pseudo R2         =        0.0160

Log likelihood = -730.18585

-----+-----
      y |      Coef.   Std. Err.      z    P>|z|     [95% Conf. Interval]
-----+-----
    idose |  -.2193379   .483878      -0.45   0.650   -1.167721   .7290455
     age |   .0286211   .0101471     2.82   0.005    .0087332   .048509
      ia |   .0029839   .0082474     0.36   0.718   -.0131807   .0191485
   _cons |  -1.866695   .5941368    -3.14   0.002   -3.031182  -.702208
```

---

The interaction term, ia, is not statistical significant with  $p$ -value = 0.718.

### b. with an cage \* idose interaction term

```
. logit y idose cage iac

Iteration 0:  log likelihood = -742.04402
Iteration 1:  log likelihood = -734.53413
Iteration 2:  log likelihood = -734.532
Iteration 3:  log likelihood = -734.532

Logistic regression              Number of obs   =       1084
                                LR chi2(3)       =        15.02
                                Prob > chi2        =        0.0018
                                Pseudo R2         =        0.0101

Log likelihood = -734.532

-----+-----
      y |      Coef.   Std. Err.      z    P>|z|     [95% Conf. Interval]
-----+-----
    idose |  -.0058596   .1241847    -0.05   0.962   -.2492571   .2375379
     cage |   .3324093   .1187822     2.80   0.005    .0996004   .5652182
      iac |  -.0438832   .0941956    -0.47   0.641   -.2285031   .1407367
   _cons |  -.5548992   .1554056    -3.57   0.000   -.8594886  -.2503099
```

---

The interaction term, iac, is also not statistical significant with  $p$ -value = 0.641.

## 2. MFPI (Fractional Polynomial)

### a. dose as treatment, age as a continuous covariate with logistic regression

#### i. use fp1

```
. mfpi, treatment(dose) fp1(age) : logistic y
[treating dose as a factor variable, i.dose]
```

Interactions with i.dose (1084 observations). Flex-1 model (least flexible)

| Var | Main    | Interact | idf | Chi2 | P      | Deviance | tdf | AIC      |
|-----|---------|----------|-----|------|--------|----------|-----|----------|
| age | FP1(.5) | FP1(.5)  | 2   | 2.03 | 0.3630 | 1452.503 | 6   | 1464.503 |

idf = interaction degrees of freedom; tdf = total model degrees of freedom

*P*-value is 0.363. Using fp1, MFPI does not detect an interaction between age and treatment.

#### ii. use fp2

```
. mfpi, treatment(dose) fp2(age) : logistic y
[treating dose as a factor variable, i.dose]
```

Interactions with i.dose (1084 observations). Flex-1 model (least flexible)

| Var | Main       | Interact   | idf | Chi2 | P      | Deviance | tdf | AIC      |
|-----|------------|------------|-----|------|--------|----------|-----|----------|
| age | FP2(-2 -2) | FP2(-2 -2) | 4   | 3.92 | 0.4164 | 1450.504 | 10  | 1470.504 |

idf = interaction degrees of freedom; tdf = total model degrees of freedom

*P*-value is 0.4164. Using fp2, MFPI does not detect an interaction between age and treatment.

### b. dose as treatment, cage (categorized age into 3 groups) with logistic regression

#### i. use fp1

```
. mfpi, treatment(dose) fp1(cage) : logistic y
[treating dose as a factor variable, i.dose]
```

Interactions with i.dose (1084 observations). Flex-1 model (least flexible)

| Var  | Main     | Interact | idf | Chi2 | P      | Deviance | tdf | AIC      |
|------|----------|----------|-----|------|--------|----------|-----|----------|
| cage | FP1(-.5) | FP1(-.5) | 2   | 1.63 | 0.4420 | 1460.776 | 6   | 1472.776 |

idf = interaction degrees of freedom; tdf = total model degrees of freedom

*P*-value is 0.4420. Using fp1, MFPI does not detect an interaction between cage and treatment.



## ii. use fp2

```
. mfpfi, treatment(dose) fp2(cage) : logistic y
[treating dose as a factor variable, i.dose]
```

Interactions with i.dose (1084 observations). Flex-1 model (least flexible)

| Var  | Main        | Interact    | idf | Chi2  | P      | Deviance | tdf | AIC      |
|------|-------------|-------------|-----|-------|--------|----------|-----|----------|
| cage | FP2(-2 -.5) | FP2(-2 -.5) | 4   | 11.83 | 0.0186 | 1450.573 | 10  | 1470.573 |

idf = interaction degrees of freedom; tdf = total model degrees of freedom

*P*-value is 0.0186. Using fp2, MFPI detects an interaction between cage and treatment.

## 3. Virtual Twin Method

We downloaded the Virtual Twin Method software “9-30-13 VT updated for website” to perform a qualitative comparison with STEPP. We apply the Virtual Twin Method to the Aspirin data set to identify the regions of interaction with treatments of Placebo and 81 mg of aspirin with AGE as the only covariate resulting in the following tree:

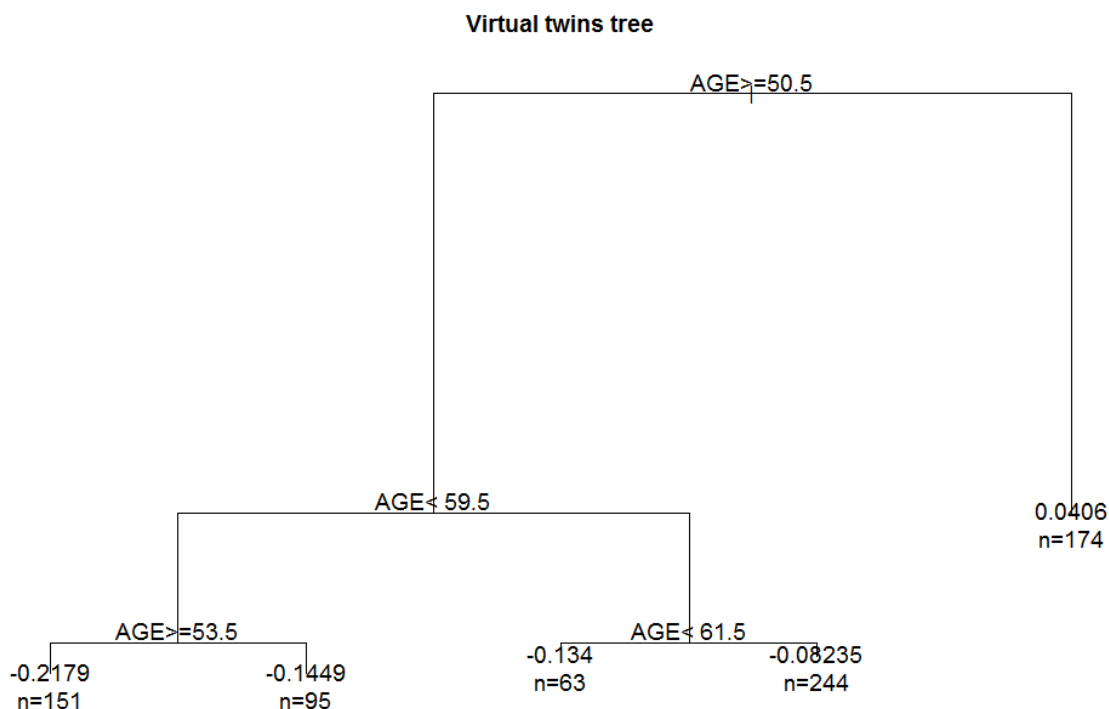


---

The Virtual Twin method identifies a similar region of AGE,  $A = \{50.5 < AGE < 59.5\}$ , for a potential treatment effect interactions, but the treatment enhancement evaluation,  $Q(A)$ , was low.

## **5. Description of the New STEPP software**

In a concerted effort, the existing STEPP R package is updated to handle the three GLM models. The latest version of STEPP (version 3.x) is available through CRAN. We redesign a whole new interface so that STEPP analysis for all different models can be done consistently. The old STEPP functions are still being maintained but may be deprecated in the future.

The following are the new interface provided to do a stepp analysis and is implemented as S4 objects:

**stepp.win** – to create a stepp window (**stwin**) with  $r_1$  and  $r_2$  as parameters

**stepp.subpop** – to create a stepp subpopulation (**stsubpop**) object; to fill in the subpopulation, use the generate method.

**stepp.CI**, **stepp.KM**, **stepp.COX**, **stepp.GLM** – constructor functions to create the corresponding S4 stepp models: **stmodelCI**, **stmodelKM**, **stmodelCOX** and **stmodelGLM**

The **summary**, **print** and **plot** methods of each of the model generate the resulting tables and 3 stepp plots for analysis.

**stepp.estimate** – apply the stepp model to the subpopulations and estimate their effects.

**stepp.test** – apply permutation and parametric tests to detect the null hypothesis of no heterogeneity among the subpopulations. It produces all the different kinds of estimates, variance covariance matrices and pvalues.

Two data sets are provided:

**aspirin** – aspirin study by John Baron et al.

**big** – big breast cancer study.

For backward compatibility with previous versions of STEPP, the old interfaces are maintained:

**analyze.CumInc.stepp**

**analyze.KM.stepp**

**stepp**

**stepp\_summary**

**stepp\_print**

**stepp\_plot**

To see how to use these S4 objects and functions, please refer to the reference manual.

## 6. Simulation results of null

### a. No treatment effects, no heterogeneity

| Gaussian |           | 5000 simulations |              |              |              |              |              |               |              |              |                |              |              |        |        |       |
|----------|-----------|------------------|--------------|--------------|--------------|--------------|--------------|---------------|--------------|--------------|----------------|--------------|--------------|--------|--------|-------|
| Z        | N(25,100) | 100, 30, 40      |              |              | 200, 60, 80  |              |              | 500, 150, 200 |              |              | 1000, 300, 400 |              |              |        |        |       |
| Y        | N(55,49)  | <b>0.100</b>     | <b>0.050</b> | <b>0.010</b> | <b>0.100</b> | <b>0.050</b> | <b>0.010</b> | <b>0.100</b>  | <b>0.050</b> | <b>0.010</b> | <b>0.100</b>   | <b>0.050</b> | <b>0.010</b> |        |        |       |
|          | t1        | 0.098            | 0.049        | 0.008        | t1           | 0.101        | 0.049        | 0.009         | t1           | 0.102        | 0.048          | 0.007        | t1           | 0.095  | 0.046  | 0.007 |
|          | t2        | 0.106            | 0.054        | 0.009        | t2           | 0.105        | 0.051        | 0.010         | t2           | 0.101        | 0.049          | 0.010        | t2           | 0.1006 | 0.0526 | 0.013 |
|          | t1*       | 0.101            | 0.048        | 0.007        | t1*          | 0.101        | 0.050        | 0.009         | t1*          | 0.100        | 0.048          | 0.007        | t1*          | 0.095  | 0.046  | 0.008 |
| Z        | N(75,25)  | 100, 30, 40      |              |              | 200, 60, 80  |              |              | 500, 150, 200 |              |              | 1000, 300, 400 |              |              |        |        |       |
| Y        | N(95,36)  | <b>0.100</b>     | <b>0.050</b> | <b>0.010</b> | <b>0.100</b> | <b>0.050</b> | <b>0.010</b> | <b>0.100</b>  | <b>0.050</b> | <b>0.010</b> | <b>0.100</b>   | <b>0.050</b> | <b>0.010</b> |        |        |       |
|          | t1        | 0.099            | 0.053        | 0.011        | t1           | 0.108        | 0.052        | 0.012         | t1           | 0.108        | 0.054          | 0.010        | t1           | 0.099  | 0.052  | 0.011 |
|          | t2        | 0.106            | 0.058        | 0.014        | t2           | 0.107        | 0.055        | 0.012         | t2           | 0.109        | 0.056          | 0.012        | t2           | 0.106  | 0.053  | 0.010 |
|          | t1*       | 0.099            | 0.052        | 0.011        | t1*          | 0.107        | 0.053        | 0.012         | t1*          | 0.108        | 0.054          | 0.009        | t1*          | 0.100  | 0.052  | 0.010 |
| Z        | N(95,36)  | 100, 30, 40      |              |              | 200, 60, 80  |              |              | 500, 150, 200 |              |              | 1000, 300, 400 |              |              |        |        |       |
| Y        | N(115,49) | <b>0.100</b>     | <b>0.050</b> | <b>0.010</b> | <b>0.100</b> | <b>0.050</b> | <b>0.010</b> | <b>0.100</b>  | <b>0.050</b> | <b>0.010</b> | <b>0.100</b>   | <b>0.050</b> | <b>0.010</b> |        |        |       |
|          | t1        | 0.096            | 0.048        | 0.010        | t1           | 0.101        | 0.052        | 0.010         | t1           | 0.102        | 0.053          | 0.009        | t1           | 0.104  | 0.057  | 0.011 |
|          | t2        | 0.105            | 0.051        | 0.009        | t2           | 0.106        | 0.053        | 0.009         | t2           | 0.098        | 0.049          | 0.012        | t2           | 0.113  | 0.057  | 0.010 |
|          | t1*       | 0.096            | 0.048        | 0.010        | t1*          | 0.099        | 0.052        | 0.011         | t1*          | 0.102        | 0.053          | 0.009        | t1*          | 0.104  | 0.057  | 0.011 |

| Bernoulli |             | 5000 simulations |              |              |              |              |              |               |              |              |                |              |              |       |       |       |
|-----------|-------------|------------------|--------------|--------------|--------------|--------------|--------------|---------------|--------------|--------------|----------------|--------------|--------------|-------|-------|-------|
| Z         | N(25,100)   | 100, 30, 40      |              |              | 200, 60, 80  |              |              | 500, 150, 200 |              |              | 1000, 300, 400 |              |              |       |       |       |
| Y         | Bin(n, 0.3) | <b>0.100</b>     | <b>0.050</b> | <b>0.010</b> | <b>0.100</b> | <b>0.050</b> | <b>0.010</b> | <b>0.100</b>  | <b>0.050</b> | <b>0.010</b> | <b>0.100</b>   | <b>0.050</b> | <b>0.010</b> |       |       |       |
|           | t1          | 0.108            | 0.050        | 0.009        | t1           | 0.101        | 0.051        | 0.011         | t1           | 0.104        | 0.053          | 0.010        | t1           | 0.093 | 0.048 | 0.011 |
|           | t2          | 0.102            | 0.052        | 0.010        | t2           | 0.107        | 0.054        | 0.013         | t2           | 0.110        | 0.057          | 0.012        | t2           | 0.105 | 0.054 | 0.012 |
|           | t1*         | 0.100            | 0.051        | 0.012        | t1*          | 0.102        | 0.052        | 0.011         | t1*          | 0.103        | 0.051          | 0.011        | t1*          | 0.096 | 0.048 | 0.010 |
| Z         | N(25,100)   | 100, 30, 40      |              |              | 200, 60, 80  |              |              | 500, 150, 200 |              |              | 1000, 300, 400 |              |              |       |       |       |
| Y         | Bin(n, 0.5) | <b>0.100</b>     | <b>0.050</b> | <b>0.010</b> | <b>0.100</b> | <b>0.050</b> | <b>0.010</b> | <b>0.100</b>  | <b>0.050</b> | <b>0.010</b> | <b>0.100</b>   | <b>0.050</b> | <b>0.010</b> |       |       |       |
|           | t1          | 0.094            | 0.046        | 0.009        | t1           | 0.102        | 0.051        | 0.012         | t1           | 0.104        | 0.055          | 0.010        | t1           | 0.099 | 0.048 | 0.009 |
|           | t2          | 0.090            | 0.045        | 0.010        | t2           | 0.105        | 0.053        | 0.010         | t2           | 0.111        | 0.057          | 0.013        | t2           | 0.106 | 0.052 | 0.008 |
|           | t1*         | 0.095            | 0.047        | 0.008        | t1*          | 0.103        | 0.052        | 0.010         | t1*          | 0.107        | 0.055          | 0.010        | t1*          | 0.098 | 0.048 | 0.009 |
| Z         | N(25,100)   | 100, 30, 40      |              |              | 200, 60, 80  |              |              | 500, 150, 200 |              |              | 1000, 300, 400 |              |              |       |       |       |
| Y         | Bin(n, 0.7) | <b>0.100</b>     | <b>0.050</b> | <b>0.010</b> | <b>0.100</b> | <b>0.050</b> | <b>0.010</b> | <b>0.100</b>  | <b>0.050</b> | <b>0.010</b> | <b>0.100</b>   | <b>0.050</b> | <b>0.010</b> |       |       |       |
|           | t1          | 0.096            | 0.049        | 0.011        | t1           | 0.094        | 0.050        | 0.012         | t1           | 0.105        | 0.049          | 0.011        | t1           | 0.099 | 0.051 | 0.010 |
|           | t2          | 0.103            | 0.055        | 0.014        | t2           | 0.101        | 0.053        | 0.012         | t2           | 0.108        | 0.055          | 0.013        | t2           | 0.104 | 0.055 | 0.011 |
|           | t1*         | 0.098            | 0.050        | 0.008        | t1*          | 0.099        | 0.047        | 0.011         | t1*          | 0.109        | 0.052          | 0.011        | t1*          | 0.101 | 0.052 | 0.009 |

| Poisson |           | 5000 simulations |              |              |              |              |              |               |              |              |                |              |              |       |       |       |
|---------|-----------|------------------|--------------|--------------|--------------|--------------|--------------|---------------|--------------|--------------|----------------|--------------|--------------|-------|-------|-------|
| Z       | N(25,100) | 100, 30, 40      |              |              | 200, 60, 80  |              |              | 500, 150, 200 |              |              | 1000, 300, 400 |              |              |       |       |       |
| Y       | Pois(5)   | <b>0.100</b>     | <b>0.050</b> | <b>0.010</b> | <b>0.100</b> | <b>0.050</b> | <b>0.010</b> | <b>0.100</b>  | <b>0.050</b> | <b>0.010</b> | <b>0.100</b>   | <b>0.050</b> | <b>0.010</b> |       |       |       |
|         | t1        | 0.093            | 0.051        | 0.010        | t1           | 0.098        | 0.047        | 0.010         | t1           | 0.104        | 0.052          | 0.011        | t1           | 0.098 | 0.053 | 0.011 |
|         | t2        | 0.100            | 0.050        | 0.009        | t2           | 0.102        | 0.047        | 0.011         | t2           | 0.102        | 0.053          | 0.008        | t2           | 0.108 | 0.056 | 0.009 |
|         | t1*       | 0.100            | 0.050        | 0.009        | t1*          | 0.097        | 0.047        | 0.009         | t1*          | 0.102        | 0.054          | 0.010        | t1*          | 0.097 | 0.052 | 0.010 |
| Z       | N(25,100) | 100, 30, 40      |              |              | 200, 60, 80  |              |              | 500, 150, 200 |              |              | 1000, 300, 400 |              |              |       |       |       |
| Y       | Pois(10)  | <b>0.100</b>     | <b>0.050</b> | <b>0.010</b> | <b>0.100</b> | <b>0.050</b> | <b>0.010</b> | <b>0.100</b>  | <b>0.050</b> | <b>0.010</b> | <b>0.100</b>   | <b>0.050</b> | <b>0.010</b> |       |       |       |
|         | t1        | 0.102            | 0.054        | 0.012        | t1           | 0.101        | 0.050        | 0.010         | t1           | 0.106        | 0.049          | 0.009        | t1           | 0.104 | 0.054 | 0.011 |
|         | t2        | 0.107            | 0.053        | 0.011        | t2           | 0.098        | 0.052        | 0.010         | t2           | 0.107        | 0.055          | 0.011        | t2           | 0.102 | 0.050 | 0.011 |
|         | t1*       | 0.104            | 0.055        | 0.011        | t1*          | 0.103        | 0.050        | 0.010         | t1*          | 0.106        | 0.048          | 0.009        | t1*          | 0.105 | 0.053 | 0.011 |
| Z       | N(25,100) | 100, 30, 40      |              |              | 200, 60, 80  |              |              | 500, 150, 200 |              |              | 1000, 300, 400 |              |              |       |       |       |
| Y       | Pois(15)  | <b>0.100</b>     | <b>0.050</b> | <b>0.010</b> | <b>0.100</b> | <b>0.050</b> | <b>0.010</b> | <b>0.100</b>  | <b>0.050</b> | <b>0.010</b> | <b>0.100</b>   | <b>0.050</b> | <b>0.010</b> |       |       |       |
|         | t1        | 0.100            | 0.048        | 0.008        | t1           | 0.102        | 0.052        | 0.010         | t1           | 0.094        | 0.048          | 0.013        | t1           | 0.105 | 0.051 | 0.010 |
|         | t2        | 0.103            | 0.052        | 0.012        | t2           | 0.108        | 0.054        | 0.011         | t2           | 0.106        | 0.057          | 0.011        | t2           | 0.103 | 0.052 | 0.010 |
|         | t1*       | 0.101            | 0.048        | 0.008        | t1*          | 0.104        | 0.056        | 0.011         | t1*          | 0.094        | 0.050          | 0.012        | t1*          | 0.106 | 0.052 | 0.010 |

b. Constant treatment effect but no heterogeneity

|          |                  |     |              |              |              |     |              |              |              |     |               |              |              |     |                |              |              |
|----------|------------------|-----|--------------|--------------|--------------|-----|--------------|--------------|--------------|-----|---------------|--------------|--------------|-----|----------------|--------------|--------------|
| Gaussian | 5000 simulations |     |              |              |              |     |              |              |              |     |               |              |              |     |                |              |              |
| Z        | N(25,100)        |     |              |              |              |     |              |              |              |     |               |              |              |     |                |              |              |
| Y (ctrl) | N(95,36)         |     | 100, 30, 40  |              |              |     | 200, 60, 80  |              |              |     | 500, 150, 200 |              |              |     | 1000, 300, 400 |              |              |
| Y (trt)  | N(95+eff,36)     |     | <b>0.100</b> | <b>0.050</b> | <b>0.010</b> |     | <b>0.100</b> | <b>0.050</b> | <b>0.010</b> |     | <b>0.100</b>  | <b>0.050</b> | <b>0.010</b> |     | <b>0.100</b>   | <b>0.050</b> | <b>0.010</b> |
| eff      | 5                | t1  | 0.095        | 0.046        | 0.009        | t1  | 0.094        | 0.050        | 0.009        | t1  | 0.097         | 0.051        | 0.012        | t1  | 0.097          | 0.048        | 0.011        |
|          |                  | t2  | 0.103        | 0.052        | 0.010        | t2  | 0.102        | 0.048        | 0.010        | t2  | 0.110         | 0.057        | 0.012        | t2  | 0.100          | 0.055        | 0.010        |
|          |                  | t1* | 0.096        | 0.047        | 0.009        | t1* | 0.096        | 0.049        | 0.008        | t1* | 0.098         | 0.050        | 0.011        | t1* | 0.098          | 0.049        | 0.011        |

|          |                   |     |              |              |              |     |              |              |              |     |               |              |              |     |                |              |              |
|----------|-------------------|-----|--------------|--------------|--------------|-----|--------------|--------------|--------------|-----|---------------|--------------|--------------|-----|----------------|--------------|--------------|
| Binomial | 5000 simulations  |     |              |              |              |     |              |              |              |     |               |              |              |     |                |              |              |
| Z        | N(25,100)         |     |              |              |              |     |              |              |              |     |               |              |              |     |                |              |              |
| Y (ctrl) | Bin(n, 0.5)       |     | 100, 30, 40  |              |              |     | 200, 60, 80  |              |              |     | 500, 150, 200 |              |              |     | 1000, 300, 400 |              |              |
| Y (trt)  | Bin(n, 0.5 + eff) |     | <b>0.100</b> | <b>0.050</b> | <b>0.010</b> |     | <b>0.100</b> | <b>0.050</b> | <b>0.010</b> |     | <b>0.100</b>  | <b>0.050</b> | <b>0.010</b> |     | <b>0.100</b>   | <b>0.050</b> | <b>0.010</b> |
| eff      | 0.1               | t1  | 0.100        | 0.051        | 0.012        | t1  | 0.101        | 0.053        | 0.010        | t1  | 0.099         | 0.048        | 0.010        | t1  | 0.108          | 0.056        | 0.013        |
|          |                   | t2  | 0.104        | 0.055        | 0.011        | t2  | 0.106        | 0.054        | 0.010        | t2  | 0.104         | 0.055        | 0.011        | t2  | 0.109          | 0.056        | 0.013        |
|          |                   | t1* | 0.099        | 0.049        | 0.012        | t1* | 0.100        | 0.054        | 0.011        | t1* | 0.099         | 0.049        | 0.010        | t1* | 0.107          | 0.055        | 0.012        |

|          |                  |     |              |              |              |     |              |              |              |     |               |              |              |     |                |              |              |
|----------|------------------|-----|--------------|--------------|--------------|-----|--------------|--------------|--------------|-----|---------------|--------------|--------------|-----|----------------|--------------|--------------|
| Poisson  | 5000 simulations |     |              |              |              |     |              |              |              |     |               |              |              |     |                |              |              |
| Z        | N(25,100)        |     |              |              |              |     |              |              |              |     |               |              |              |     |                |              |              |
| Y (ctrl) | Pois(5)          |     | 100, 30, 40  |              |              |     | 100, 60, 80  |              |              |     | 500, 150, 200 |              |              |     | 1000, 300, 400 |              |              |
| Y (trt)  | Pois(5+eff)      |     | <b>0.100</b> | <b>0.050</b> | <b>0.010</b> |     | <b>0.100</b> | <b>0.050</b> | <b>0.010</b> |     | <b>0.100</b>  | <b>0.050</b> | <b>0.010</b> |     | <b>0.100</b>   | <b>0.050</b> | <b>0.010</b> |
| eff      | 1                | t1  | 0.105        | 0.053        | 0.012        | t1  | 0.096        | 0.050        | 0.011        | t1  | 0.102         | 0.053        | 0.009        | t1  | 0.099          | 0.049        | 0.011        |
|          |                  | t2  | 0.109        | 0.058        | 0.011        | t2  | 0.098        | 0.051        | 0.010        | t2  | 0.103         | 0.053        | 0.011        | t2  | 0.111          | 0.059        | 0.012        |
|          |                  | t1* | 0.106        | 0.054        | 0.013        | t1* | 0.098        | 0.051        | 0.010        | t1* | 0.101         | 0.054        | 0.009        | t1* | 0.099          | 0.049        | 0.011        |

STEPP Subpopulation Analysis for Continuous, Binary and Count Outcomes

|                                                                                                                                                                                                                                                                                                                                                                                                                                                                                       |                                                                                                                                                                                                                                                                                                                                                                                                                                                                                                                                                                                                                                                                                                                                                                                                                                                                                                                                                                                                                                                                                                                                                                                                                                                                                                                                                                                                          |  |  |                                                                                                                                                                                                                                                                                                                                                                                                                                                                                       |                                                                                                                                                                                                                                                                                                                                                                                                                                                                                                                                                                                                                                                                                                                                |
|---------------------------------------------------------------------------------------------------------------------------------------------------------------------------------------------------------------------------------------------------------------------------------------------------------------------------------------------------------------------------------------------------------------------------------------------------------------------------------------|----------------------------------------------------------------------------------------------------------------------------------------------------------------------------------------------------------------------------------------------------------------------------------------------------------------------------------------------------------------------------------------------------------------------------------------------------------------------------------------------------------------------------------------------------------------------------------------------------------------------------------------------------------------------------------------------------------------------------------------------------------------------------------------------------------------------------------------------------------------------------------------------------------------------------------------------------------------------------------------------------------------------------------------------------------------------------------------------------------------------------------------------------------------------------------------------------------------------------------------------------------------------------------------------------------------------------------------------------------------------------------------------------------|--|--|---------------------------------------------------------------------------------------------------------------------------------------------------------------------------------------------------------------------------------------------------------------------------------------------------------------------------------------------------------------------------------------------------------------------------------------------------------------------------------------|--------------------------------------------------------------------------------------------------------------------------------------------------------------------------------------------------------------------------------------------------------------------------------------------------------------------------------------------------------------------------------------------------------------------------------------------------------------------------------------------------------------------------------------------------------------------------------------------------------------------------------------------------------------------------------------------------------------------------------|
| Manuscript ID:                                                                                                                                                                                                                                                                                                                                                                                                                                                                        | CT-15-0171.R1                                                                                                                                                                                                                                                                                                                                                                                                                                                                                                                                                                                                                                                                                                                                                                                                                                                                                                                                                                                                                                                                                                                                                                                                                                                                                                                                                                                            |  |  |                                                                                                                                                                                                                                                                                                                                                                                                                                                                                       |                                                                                                                                                                                                                                                                                                                                                                                                                                                                                                                                                                                                                                                                                                                                |
| Funding Information:                                                                                                                                                                                                                                                                                                                                                                                                                                                                  | <p><b>Italian Ministry of Education, University and Research</b> ✖<br/>2007AYHZWC</p> <p>U.S. Department of Health and Human Services &gt;<br/>National Institutes of Health &gt;<br/><b>National Cancer Institute</b><br/>P30 DE020752</p> <p>U.S. Department of Health and Human Services &gt;<br/><b>National Institutes of Health</b><br/>(2 of 2) COPD Grant/5R01HL089856-08<br/>Lung Disease TG/T32 HL007427</p>                                                                                                                                                                                                                                                                                                                                                                                                                                                                                                                                                                                                                                                                                                                                                                                                                                                                                                                                                                                   |  |  |                                                                                                                                                                                                                                                                                                                                                                                                                                                                                       |                                                                                                                                                                                                                                                                                                                                                                                                                                                                                                                                                                                                                                                                                                                                |
| Submitting Author:                                                                                                                                                                                                                                                                                                                                                                                                                                                                    | <div style="border: 1px solid #ccc; padding: 2px; display: flex; align-items: center;"> <input type="text" value="Yip, Wai-Ki"/> <input checked="" type="checkbox"/> Save             <input type="button" value="Yip, Wai-Ki (proxy)"/> </div> <hr/> <ul style="list-style-type: none"> <li> <span style="display: inline-block; width: 15px; height: 15px; border: 1px solid #ccc; border-radius: 50%; margin-right: 5px;"></span> <span style="font-size: 0.8em;">                     • <i>primary affiliation</i><br/>                     Dana Farber Cancer Institute - Biostatistics and Computation Biology<br/>                     3 Blackfan Circle 11th floor Boston Massachusetts 02115<br/>                     United States<br/>                     T: 6176326574                 </span> </li> </ul>                                                                                                                                                                                                                                                                                                                                                                                                                                                                                                                                                                                  |  |  |                                                                                                                                                                                                                                                                                                                                                                                                                                                                                       |                                                                                                                                                                                                                                                                                                                                                                                                                                                                                                                                                                                                                                                                                                                                |
| Authors & Institutions:                                                                                                                                                                                                                                                                                                                                                                                                                                                               | <table style="width: 100%; border-collapse: collapse;"> <tr> <td style="width: 30%; vertical-align: top;"> <ul style="list-style-type: none"> <li><input type="button" value="Yip, Wai-Ki proxy"/></li> <li><input type="button" value="Gelber, Richard D proxy"/></li> <li><input type="button" value="Bonetti, Marco proxy"/></li> <li><input type="button" value="Cole, Bernard proxy"/></li> <li><input type="button" value="Lazar, Ann proxy"/></li> <li><input type="button" value="Barcella, William proxy"/></li> <li><input type="button" value="Wang, Xin Victoria proxy"/></li> </ul> </td> <td style="width: 70%; vertical-align: top;"> <ul style="list-style-type: none"> <li>• Dana Farber Cancer Institute - Biostatistics and Computation Biology<br/>3 Blackfan Circle 11th floor , Boston, Massachusetts 02115<br/>United States</li> <li>• DFCI - Biostatistics and Computational Biology<br/>CLSB 11007 450 Brookline Ave. , Boston, Massachusetts 02215<br/>United States</li> <li>• Milan<br/>Italy</li> <li>• University of Vermont<br/>Burlington, Vermont<br/>United States</li> <li>• University of California, San Francisco<br/>San Francisco, California<br/>United States</li> <li>• UCL<br/>London<br/>United Kingdom of Great Britain and Northern Ireland</li> <li>• 450 Brookline Ave , Boston, Massachusetts 02215<br/>United States</li> </ul> </td> </tr> </table> |  |  | <ul style="list-style-type: none"> <li><input type="button" value="Yip, Wai-Ki proxy"/></li> <li><input type="button" value="Gelber, Richard D proxy"/></li> <li><input type="button" value="Bonetti, Marco proxy"/></li> <li><input type="button" value="Cole, Bernard proxy"/></li> <li><input type="button" value="Lazar, Ann proxy"/></li> <li><input type="button" value="Barcella, William proxy"/></li> <li><input type="button" value="Wang, Xin Victoria proxy"/></li> </ul> | <ul style="list-style-type: none"> <li>• Dana Farber Cancer Institute - Biostatistics and Computation Biology<br/>3 Blackfan Circle 11th floor , Boston, Massachusetts 02115<br/>United States</li> <li>• DFCI - Biostatistics and Computational Biology<br/>CLSB 11007 450 Brookline Ave. , Boston, Massachusetts 02215<br/>United States</li> <li>• Milan<br/>Italy</li> <li>• University of Vermont<br/>Burlington, Vermont<br/>United States</li> <li>• University of California, San Francisco<br/>San Francisco, California<br/>United States</li> <li>• UCL<br/>London<br/>United Kingdom of Great Britain and Northern Ireland</li> <li>• 450 Brookline Ave , Boston, Massachusetts 02215<br/>United States</li> </ul> |
| <ul style="list-style-type: none"> <li><input type="button" value="Yip, Wai-Ki proxy"/></li> <li><input type="button" value="Gelber, Richard D proxy"/></li> <li><input type="button" value="Bonetti, Marco proxy"/></li> <li><input type="button" value="Cole, Bernard proxy"/></li> <li><input type="button" value="Lazar, Ann proxy"/></li> <li><input type="button" value="Barcella, William proxy"/></li> <li><input type="button" value="Wang, Xin Victoria proxy"/></li> </ul> | <ul style="list-style-type: none"> <li>• Dana Farber Cancer Institute - Biostatistics and Computation Biology<br/>3 Blackfan Circle 11th floor , Boston, Massachusetts 02115<br/>United States</li> <li>• DFCI - Biostatistics and Computational Biology<br/>CLSB 11007 450 Brookline Ave. , Boston, Massachusetts 02215<br/>United States</li> <li>• Milan<br/>Italy</li> <li>• University of Vermont<br/>Burlington, Vermont<br/>United States</li> <li>• University of California, San Francisco<br/>San Francisco, California<br/>United States</li> <li>• UCL<br/>London<br/>United Kingdom of Great Britain and Northern Ireland</li> <li>• 450 Brookline Ave , Boston, Massachusetts 02215<br/>United States</li> </ul>                                                                                                                                                                                                                                                                                                                                                                                                                                                                                                                                                                                                                                                                           |  |  |                                                                                                                                                                                                                                                                                                                                                                                                                                                                                       |                                                                                                                                                                                                                                                                                                                                                                                                                                                                                                                                                                                                                                                                                                                                |
| Contact Author (populates the ##PROLE_AUTHOR_...## e-mail tags):                                                                                                                                                                                                                                                                                                                                                                                                                      | <div style="border: 1px solid #ccc; padding: 2px; display: flex; align-items: center;"> <input type="text" value="Yip, Wai-Ki"/> <input checked="" type="checkbox"/> Save             <span style="margin-left: 20px;">Current Contact Author: Yip, Wai-Ki (proxy)</span> </div>                                                                                                                                                                                                                                                                                                                                                                                                                                                                                                                                                                                                                                                                                                                                                                                                                                                                                                                                                                                                                                                                                                                         |  |  |                                                                                                                                                                                                                                                                                                                                                                                                                                                                                       |                                                                                                                                                                                                                                                                                                                                                                                                                                                                                                                                                                                                                                                                                                                                |

Running Head:

GLM STEPP

Keywords:

Randomized Clinical Trials (RCT) ✖, Subpopulation treatment effect pattern plot (STEPP) ✖, Generalized Linear Models (GLM) ✖, Subgroup Analysis ✖
